# Supplementary material for: Listeriosis Outbreaks Associated with Soft Cheeses, United States, 1998–2014
Source: PubMed Central journal article supplement (PMC6004860; doi:10.3201/eid2406.171051), 2018-06
Supplement: 17-1051-Techapp-s1.pdf [file 17-1051-Techapp-s1.pdf]

# Listeriosis Outbreaks Associated with Soft Cheeses, United States, 1998–2014

## Technical Appendix

**Technical Appendix Table.** Characteristics of listeriosis outbreaks associated with soft cheese, United States, 1998–2014\*

| Year | State          | Implicated cheese†                | No. infections | No. hospitalized | No. fetal losses | No. deaths | No. (%) Hispanic | No. (%) pregnancy associated | Recall | Made from pasteurized milk | Issues or observations                                                                                                                                                                                                              | Serotype /Lineage / Sequence Type (ST) / Clonal Complex (CC)‡ |
|------|----------------|-----------------------------------|----------------|------------------|------------------|------------|------------------|------------------------------|--------|----------------------------|-------------------------------------------------------------------------------------------------------------------------------------------------------------------------------------------------------------------------------------|---------------------------------------------------------------|
| 2000 | North Carolina | Latin-style cheese                | 12             | 12               | 5                | 0          | 12/12 (100)      | 10/12 (83)                   | N/A§   | No                         | Made from contaminated unpasteurized milk†                                                                                                                                                                                          | 4b / I / ST558 / CC type ST558                                |
| 2003 | Texas          | Latin-style cheese                | 12             | 12               |                  | 1          |                  |                              | N/A¶   | No                         | Unknown                                                                                                                                                                                                                             | 4b / I / ST1 / CC1                                            |
| 2005 | Texas          | Latin-style cheese                | 12             | 12               |                  | 0          |                  |                              | No     | No                         | Unknown                                                                                                                                                                                                                             | 1/2b / I / Undetermined / Undetermined                        |
| 2006 | Oregon         | Sheep's milk cheese               | 3              | 2                | 0                | 1          | 0/2 (0)          | 0/2 (0)                      | No     | Yes                        | Unknown                                                                                                                                                                                                                             | 4b / I / ST4 / CC4                                            |
| 2008 | Multistate     | Latin-style cheese                | 8              | 8                | 2                | 0          | 8/8 (100)        | 7/8 (88)                     | Yes    | Yes                        | Inadequate separation of processing rooms (1)                                                                                                                                                                                       | 1/2a / II / ST1216 / CC11                                     |
| 2009 | Multistate     | Latin-style cheese                | 18             | 11               | 0                | 0          | 10/11 (91)       | 9/11 (82)                    | Yes    | Yes                        | Unknown                                                                                                                                                                                                                             | 4b / I / ST663 / CC type ST663                                |
| 2009 | Multistate     | Latin-style cheese                | 8              | 3                | 0                | 0          | 3/3 (100)        | 3/4 (75)                     | Yes    | Yes                        | Sanitation deficiencies<br>Failure to hold food at proper temperature<br>Failure to implement measures to exclude pests<br>Lack of appropriate training in food handling and food protection for food handlers and supervisors (2)# | 1/2b / I / ST5 / CC5                                          |
| 2010 | Multistate     | Middle Eastern, Eastern European, | 34             | 32               | 1                | 4          | 3/33 (9)         | 6/33 (18)                    | Yes    | Yes                        | Environmental contamination with                                                                                                                                                                                                    | 4b / I / ST6 / CC6                                            |

| Year  | State      | Implicated cheese†                                                    | No. infections | No. hospitalized | No. fetal losses | No. deaths | No. (%) Hispanic | No. (%) pregnancy associated | Recall | Made from pasteurized milk | Issues or observations                                                                                                                   | Serotype /Lineage / Sequence Type (ST) / Clonal Complex (CC)‡ |
|-------|------------|-----------------------------------------------------------------------|----------------|------------------|------------------|------------|------------------|------------------------------|--------|----------------------------|------------------------------------------------------------------------------------------------------------------------------------------|---------------------------------------------------------------|
| 2011  | Michigan   | Mediterranean, and Latin-style cheeses<br>Middle Eastern-style cheese | 2              | 2                | 1                | 1          | 0/2 (0)          | 1/2 (50)                     | Yes    | Yes                        | <i>Listeria monocytogenes</i> (3)<br>Environmental contamination with <i>Listeria monocytogenes</i>                                      | 1/2b / I / ST5 / CC5                                          |
| 2011  | New Jersey | Latin-style cheese                                                    | 2              | 2                | 0                | 0          | 1/1 (100)        | 2/2 (100)                    | Yes    | Yes                        | <i>Listeria monocytogenes</i><br>Environmental contamination with <i>Listeria monocytogenes</i>                                          | 1/2b / I / ST5 / CC5                                          |
| 2011  | Multistate | Blue-veined cheese                                                    | 15             | 1                | 0                | 1          | 0/14 (0)         | 0/15 (0)                     | Yes    | No                         | Unknown                                                                                                                                  | 4b / I / ST554 / CC554                                        |
| 2012  | Multistate | Italian-style cheese (Ricotta salata)                                 | 22             | 21               | 1                | 4          | 1/14 (7)         | 9/22 (41)                    | Yes    | Yes                        | Persistence of strains in environmental niches of processing plants in Italy (4)<br>Sanitation deficiencies (5)                          | 1/2a / II / ST101 / CC101                                     |
| 2013  | Multistate | French-style cheese (soft-ripened farmstead cheese)                   | 6              | 6                | 1                | 1          | 1/6 (17)         | 1/6 (17)                     | Yes    | Yes                        | Sanitation deficiencies                                                                                                                  | 4b / I / ST6 / CC6                                            |
| 2013  | Multistate | Latin-style cheese                                                    | 8              | 7                | 0                | 1          | 5/5 (100)        | 2/5 (40)                     | Yes    | Yes                        | Sanitation deficiencies                                                                                                                  | 1/2b / I / ST5 / CC5                                          |
| 2013  | Multistate | Latin-style cheese                                                    | 9              | 8                | 2                | 1          | 9/9 (100)        | 6/9 (67)                     | Yes    | Yes                        | Environmental contamination with <i>Listeria monocytogenes</i> (6)<br>Environmental contamination with <i>Listeria monocytogenes</i> (3) | 4b / I / ST2 / CC2                                            |
| 2014  | Washington | Latin-style cheese                                                    | 3              | 2                | 0                | 1          | 3/3 (100)        | 1/3 (33)                     | Yes    | Yes                        | Unknown                                                                                                                                  | 1/2a / II / Undetermined / Undetermined                       |
| Total |            |                                                                       | 180            | 146              | 14               | 17         | 38/116 (33)      | 62/140 (44)                  |        |                            |                                                                                                                                          |                                                               |

\*Information on fetal losses, ethnicity, and pregnancy status is not included in health department reports of foodborne disease outbreaks to the Foodborne Disease Outbreak Surveillance System (FDOSS) and therefore is missing for some outbreaks. In these instances, the denominator is the number of infections for which the characteristic was reported. CC, clonal complex; ST, sequence type.

†Latin-style cheese includes queso fresco, queso blanco, queso blando, queso cotija, queso panela, queso requesón, queso ranchero, queso Oaxaca); Middle Eastern-style cheese includes Middle Eastern string cheese, nabulsi, ackawi; Eastern European- and Mediterranean-style cheese includes feta and Bulgarian feta. A complete list of cheeses recalled in these outbreaks is available at <https://www.fda.gov/Safety/Recalls/default.htm>. Summaries of CDC *Listeria* outbreak investigations are available at <http://www.cdc.gov/listeria/outbreaks/index.html>.

‡Outbreak isolates were subject to whole genome sequencing. We sequenced Nextera XT DNA libraries on the MiSeq platform (Illumina). After quality control of raw reads, we uploaded sequences with >20x coverage in the *Listeria* whole genome multilocus sequence typing database (wgMLST) in BioNumerics 7.5, and retrieved their sequence type (ST) and lineage. We identified clonal complex (CC) using information from the MLST database of the Institut Pasteur, France; in instances where no database matches existed, we labeled outbreaks Undermined (Texas 2005, Washington 2014).

§Cheese was produced in a private home.

¶Cheese was produced at a manufacturing facility in Mexico and brought across the border for personal use.

#*L. monocytogenes* isolates from these 2 outbreaks were indistinguishable by pulsed-field gel electrophoresis. The Food and Drug Administration sought a permanent injunction against the manufacturer after the first outbreak. The owners moved the manufacturing facility to a nearby location and reopened under a new name.

## References

1. Jackson KA, Biggerstaff M, Tobin-D'Angelo M, Sweat D, Klos R, Nosari J, et al. Multistate outbreak of *Listeria monocytogenes* associated with Mexican-style cheese made from pasteurized milk among pregnant, Hispanic women. *J Food Prot.* 2011;74:949–53. [PubMed](#)  
<http://dx.doi.org/10.4315/0362-028X.JFP-10-536>
2. US Food and Drug Administration. FDA Form 483: Quesos Mi Pueblito, LLC. 2010 Jan 20 [cited 2016 Apr 8].  
<http://www.fda.gov/ucm/groups/fdagov-public/@fdagov-afda-orgs/documents/document/ucm198180.pdf>
3. Acciari VA, Iannetti L, Gattuso A, Sonnessa M, Scavia G, Montagna C, et al. Tracing sources of *Listeria* contamination in traditional Italian cheese associated with a US outbreak: investigations in Italy. *Epidemiol Infect.* 2016;144:2719–27. [PubMed](#)  
<http://dx.doi.org/10.1017/S095026881500254X>
4. US Food and Drug Administration. FDA investigation summary—multistate outbreak of *Listeria monocytogenes* linked to certain Crave Brothers Farmstead Classics Cheeses. 2014 May 16 [cited 2016 Apr 11]. <http://wayback.archive-it.org/7993/20171114154927/https://www.fda.gov/Food/RecallsOutbreaksEmergencies/Outbreaks/ucm359588.htm>
5. US Department of Justice. Delaware cheese company agrees to plead guilty to food adulteration charge, signs consent decree. 2016 Jan 29 [cited 2016 Apr 8]. <https://www.justice.gov/opa/pr/delaware-cheese-company-agrees-plead-guilty-food-adulteration-charge-signs-consent-decree>
6. Michigan Department of Agriculture & Rural Development Food and Dairy Division. Annual report fiscal year 2012 [cited 2016 Apr 8].  
[https://www.michigan.gov/documents/mdard/FY12\\_MDARD\\_Food\\_and\\_Dairy\\_Annual\\_report\\_419276\\_7.pdf](https://www.michigan.gov/documents/mdard/FY12_MDARD_Food_and_Dairy_Annual_report_419276_7.pdf)
